# Supplementary material for: What Is the Diagnosis in Patients with Type 2 Diabetes Who Have a Painful Shoulder? Results from a Prospective Cross-Sectional Study
Source: MDPI journal article supplement (doi:10.3390/jcm9124097), 2020-12-18
Supplement: s1 [file s1]

## Supplementary data

**Table S1: Criteria for ultrasound-diagnosed disorders groups**

| Ultrasound diagnosis             | Diagnostic criteria                                                                                                                                                                                                                                            |
|----------------------------------|----------------------------------------------------------------------------------------------------------------------------------------------------------------------------------------------------------------------------------------------------------------|
| Subacromial disorders            |                                                                                                                                                                                                                                                                |
| Subacromial-subdeltoid bursitis  | Presence of any of the following criteria: bursal effusion >2mm, synovial proliferation, exhibition of Doppler signal, or a teardrop-shaped distal end of the bursa.                                                                                           |
| Calcifying tendinopathy          | Presence of hyperechoic foci, with or without a well-defined acoustic shadow, or with a faint shadow in a rotator cuff tendon.                                                                                                                                 |
| Tendinopathy                     | Focally or diffusely thickened rotator cuff tendon with a heterogeneous hypoechoic appearance.                                                                                                                                                                 |
| Rotator cuff tears               | Presence of any of the following criteria: bursal or articular surface sided hypoechoic tendon discontinuity, or intratendinous mixed hyperechoic and hypoechoic region.                                                                                       |
| <i>Partial-thickness tear</i>    | Presence of any of the following criteria: focal tendon thinning, complete tendon non-visualization, focal tendon discontinuity with homogeneous echogenicity without focal thinning, or inversion of the superficial bursa contour and/or hyperechoic tissue. |
| <i>Full-thickness tear</i>       |                                                                                                                                                                                                                                                                |
| Biceps pathology                 |                                                                                                                                                                                                                                                                |
| <i>Tear</i>                      | An anechoic cleft in the tendon (partial or complete) with fluid in the sheath or a non-visualisation.                                                                                                                                                         |
| <i>Dislocation</i>               | Displacement over the lesser tuberosity and bicipital groove (subluxation), or completely out of the bicipital groove (dislocation).                                                                                                                           |
| <i>Tendinopathy</i>              | Locally or diffusely thickened tendon with a heterogeneous hypoechoic appearance.                                                                                                                                                                              |
| <i>Tenosynovitis</i>             | Hypoechoic or anechoic thickened tissue with or without fluid within the tendon sheath, and which may exhibit Doppler signal.                                                                                                                                  |
| Dynamic impingement              | Bumping of the bursa or supraspinatus tendon on the coraco-acromial ligament, and/or anterior or lateral part of the acromion during dynamic assessment.                                                                                                       |
| Glenohumeral disorders           |                                                                                                                                                                                                                                                                |
| Adhesive capsulitis              | Rotator interval proliferation with/without glenohumeral effusion without the presence of a rotator cuff tear.                                                                                                                                                 |
| Glenohumeral effusion            | Presence of effusion in the glenohumeral joint.                                                                                                                                                                                                                |
| Other disorders                  |                                                                                                                                                                                                                                                                |
| Acromioclavicular osteoarthritis | Presence of any of the following criteria: joint space narrowing, osteophytes, effusion, or para-articular cysts.                                                                                                                                              |

References are provided at the end of this file , references [1-3], but also included in the main manuscript.

**Table S2: Neurological feet examination procedures with diagnostic criteria**

| Type of examination of the feet | Procedure                                                                                                                                                                                                                                                                                                                   | Diagnostic criteria                                                                                                                                              |
|---------------------------------|-----------------------------------------------------------------------------------------------------------------------------------------------------------------------------------------------------------------------------------------------------------------------------------------------------------------------------|------------------------------------------------------------------------------------------------------------------------------------------------------------------|
| Inspection                      | Procedure: Look for clawed foot, hammertoes, and Charcot foot deformity, a bone deformity caused by neuropathy.                                                                                                                                                                                                             | Presence of abnormality.                                                                                                                                         |
| Muscle weakness test            | Procedure: Test the flexion and extension strength of the small toes, and extension of the great toes.                                                                                                                                                                                                                      | Distal muscle weakness: ranging from no muscle contraction or any movement possible to less strength than expected.                                              |
| Ankle reflex test               | Tool: a reflex hammer.<br>Procedure: With the patient sitting, the examiner dorsiflexes the foot and gently strikes the Achilles tendon with the reflex hammer.<br>In the absence of reflex, the test will be repeated with reinforcement.                                                                                  | Abnormal reflex test: scored as zero (absent with reinforcement), one (present but decreased), two (normal), three (increased), or four (increased with clonus). |
| Touch sensation test            | Tool: a Semmes-Weinstein monofilament.<br>Procedure: The monofilament is placed at four sites at the plantar side of the foot; big toe, first, third and fifth head of metatarsal bone. Repeat the test up to 3 times on an area when the patient does not indicate they feel the monofilament.                             | Abnormal sensation: when the patient feels the presence of the buckling monofilament at maximum 1 of the four mentioned sites even after the third time. .       |
| Vibrating sensory test          | Tool: a 128-Hz Rydel-Seiffer tuning fork.<br>Procedure: The tuning fork is placed at the dorsum of the interphalangeal joint of the big toes. The patient is asked to respond if he can no longer feel the vibration. At this time, the vibration is determined on the 9- point grading scale (0/8–8/8) of the tuning fork. | Below 4 points is considered as an abnormal vibration sense.                                                                                                     |

References are provided at the end of this file, references: [4-10], but also included in the main manuscript.

**Table S3: Diagnostic criteria for stiff hand syndrome**

| Type of examination of the hand | Definition                                                                       |
|---------------------------------|----------------------------------------------------------------------------------|
| Tabletop sign*                  | Inability to place the palms and fingers completely flat on a horizontal surface |
| Prayer sign*                    | Inability to fully extend the fingers                                            |

\* We considered a stiff hand syndrome present if at least one sign was positive; References are provided at the end of this file, references: [11-13], but also included in the main manuscript.

## Reference

1. Lee, J.C.; Sykes, C.; Saifuddin, A.; Connell, D. Adhesive capsulitis: sonographic changes in the rotator cuff interval with arthroscopic correlation. *Skeletal Radiol* **2005**, *34*, 522-527, doi:10.1007/s00256-005-0957-0.
2. Tandon, A.; Dewan, S.; Bhatt, S.; Jain, A.K.; Kumari, R. Sonography in diagnosis of adhesive capsulitis of the shoulder: a case-control study. *Journal of ultrasound* **2017**, *20*, 227-236, doi:10.1007/s40477-017-0262-5.
3. Ottenheijm, R.P.; Joore, M.A.; Walenkamp, G.H.; Weijers, R.E.; Winkens, B.; Cals, J.W.; de Bie, R.A.; Dinant, G.J. The Maastricht Ultrasound Shoulder pain trial (MUST): ultrasound imaging as a diagnostic triage tool to improve management of patients with non-chronic shoulder pain in primary care. *BMC Musculoskelet Disord* **2011**, *12*, 154, doi:10.1186/1471-2474-12-154.
4. England, J.D.; Gronseth, G.S.; Franklin, G.; Miller, R.G.; Asbury, A.K.; Carter, G.T.; Cohen, J.A.; Fisher, M.A.; Howard, J.F.; Kinsella, L.J., et al. Distal symmetric polyneuropathy: a definition for clinical research: report of the American Academy of Neurology, the American Association of Electrodiagnostic Medicine, and the American Academy of Physical Medicine and Rehabilitation. *Neurology* **2005**, *64*, 199-207, doi:10.1212/01.Wnl.0000149522.32823.Ea.
5. Alport, A.R.; Sander, H.W. Clinical approach to peripheral neuropathy: anatomic localization and diagnostic testing. *Continuum (Minneapolis, Minn.)* **2012**, *18*, 13-38, doi:10.1212/01.CON.0000411546.13207.b1.
6. Yang, Z.; Zhang, Y.; Chen, R.; Huang, Y.; Ji, L.; Sun, F.; Hong, T.; Zhan, S. Simple tests to screen for diabetic peripheral neuropathy. *Cochrane Database of Systematic Reviews* **2014**, 10.1002/14651858.CD010975, doi:10.1002/14651858.CD010975.
7. Feng, Y.; Schlösser, F.J.; Sumpio, B.E. The Semmes Weinstein monofilament examination as a screening tool for diabetic peripheral neuropathy. *Journal of vascular surgery* **2009**, *50*, 675-682, 682.e671, doi:10.1016/j.jvs.2009.05.017.
8. Smieja, M.; Hunt, D.L.; Edelman, D.; Etchells, E.; Cornuz, J.; Simel, D.L. Clinical examination for the detection of protective sensation in the feet of diabetic patients. International Cooperative Group for Clinical Examination Research. *Journal of general internal medicine* **1999**, *14*, 418-424, doi:10.1046/j.1525-1497.1999.05208.x.
9. Kästenbauer, T.; Sauseng, S.; Brath, H.; Abrahamian, H.; Irsigler, K. The value of the Rydel-Seiffer tuning fork as a predictor of diabetic polyneuropathy compared with a neurothesiometer. *Diabet Med* **2004**, *21*, 563-567, doi:10.1111/j.1464-5491.2004.01205.x.
10. Liniger, C.; Albeanu, A.; Bloise, D.; Assal, J.P. The tuning fork revisited. *Diabet Med* **1990**, *7*, 859-864, doi:10.1111/j.1464-5491.1990.tb01319.x.
11. Gokcen, N.; Cetinkaya Altuntas, S.; Coskun Benlidayi, I.; Sert, M.; Nazlican, E.; Sarpel, T. An overlooked rheumatologic manifestation of diabetes: diabetic cheiroarthropathy. *Clin Rheumatol* **2019**, *38*, 927-932, doi:10.1007/s10067-019-04454-z.
12. Hill, N.E.; Roscoe, D.; Stacey, M.J.; Chew, S. Cheiroarthropathy and tendinopathy in diabetes. *Diabet Med* **2019**, *36*, 939-947, doi:10.1111/dme.13955.
13. Fisher, L.; Kurtz, A.; Shipley, M. Association between cheiroarthropathy and frozen shoulder in patients with insulin-dependent diabetes mellitus. *Br J Rheumatol* **1986**, *25*, 141-146, doi:10.1093/rheumatology/25.2.141.
